# Supplementary material for: Synthesis of two novel neutral polymeric bonding agents to enhance the mechanical properties of composite solid propellants
Source: Royal Society of Chemistry journal article supplement (doi:10.1039/d2ra01842j), 2022-01-01
Supplement: d2ra01842j1.pdf [file d2ra01842j1.pdf]

## Supplementary Material

### Synthesis of Two Novel Neutral Polymeric Bonding Agents for Enhancing Mechanical Properties of Composite Solid Propellants

ZhuoWu,<sup>a, b</sup>Jian Zhang,<sup>a</sup> ShuangXu,<sup>b</sup> Hongxu Li,<sup>b</sup> Huan Zhou,<sup>b</sup> Jian Zheng,<sup>c</sup> Aimin Pang,<sup>\*, b</sup> and Yulin Yang<sup>\*, a</sup>

<sup>a</sup> MIIT Key Laboratory of Critical Materials Technology for New Energy Conversion and Storage, School of Chemistry and Chemical Engineering, Harbin Institute of Technology, Harbin 150001, P. R. China.

<sup>b</sup> Science and Technology on Aerospace Chemical Power Laboratory, Hubei Institute of Aerospace Chemotechnology, Xiangyang, 441003, Hubei, China.

<sup>c</sup> China Aerospace Science and Technology Corporation, 16 Fucheng Road, Haidian District, Beijing 100048, China.

\* Corresponding author:

E-mail addresses: ylyang@hit.edu.cn (Y.L. Yang).

## Contents

|                                                                                                |            |
|------------------------------------------------------------------------------------------------|------------|
| <b>Table S1 <sup>1</sup>H NMR assigned peaks of two neutral polymeric bonding agents.....</b>  | <b>S-3</b> |
| <b>Table S2 <sup>13</sup>C NMR assigned peaks of two neutral polymeric bonding agents.....</b> | <b>S-4</b> |

**Table S1  $^1\text{H}$  NMR assigned peaks of two neutral polymeric bonding agents**

| NPBA-1                                                          | $^1\text{H}$ NMR<br>(500MHz,DMF-d7) | NPBA-2                                                                                   | $^1\text{H}$ NMR<br>(500MHz,DMF-d7) |
|-----------------------------------------------------------------|-------------------------------------|------------------------------------------------------------------------------------------|-------------------------------------|
| OH*                                                             | 5.05-4.85                           | CO <sub>2</sub> CH <sub>2</sub> *                                                        | 4.45-4.65                           |
| OCH <sub>2</sub> *CH <sub>2</sub> OH                            | 4.30-4.18                           | CO <sub>2</sub> CH <sub>2</sub> *                                                        | 4.05-3.85                           |
| OCH <sub>2</sub> CH <sub>2</sub> *OH                            | 3.82-3.74                           | S-CH <sub>2</sub> CH <sub>2</sub> *OH                                                    | 3.78-3.65                           |
| CH <sub>2</sub> CH <sub>2</sub> *OH                             | 3.74-3.70                           | CNCH <sub>2</sub> *CH <sub>2</sub><br>OCH <sub>2</sub> CH <sub>2</sub> *OCH <sub>2</sub> | 3.45-3.20                           |
| CH <sub>2</sub> CH <sub>2</sub> *CN                             | 3.45-3.10                           | OCH <sub>2</sub> CHOCH <sub>2</sub> *<br>SCH <sub>2</sub> *CH <sub>2</sub> OH            | 2.88-2.76                           |
| CH <sub>2</sub> CH <sub>2</sub> *COO                            | 3.00-2.88                           | CHCNCH <sub>2</sub> *CH <sub>2</sub><br>*C CH <sub>3</sub> CO                            | 2.40-2.00                           |
| CH <sub>2</sub> *CHCOO<br>S-CH <sub>2</sub> *CH <sub>2</sub> OH | 2.88-2.79                           | CH <sub>2</sub> CCH <sub>3</sub> *COO                                                    | 1.55-1.30                           |
| CH <sub>2</sub> *CHCN                                           | 2.40-1.80                           |                                                                                          |                                     |

**Table S2  $^{13}\text{C}$  NMR assigned peaks of two neutral polymeric bonding agents**

| NPBA-1                                              | $^{13}\text{C}$ NMR<br>(125MHz,<br>DMSO-d7) | NPBA-2                                              | $^{13}\text{C}$ NMR<br>(125MHz,<br>DMSO-d7) |
|-----------------------------------------------------|---------------------------------------------|-----------------------------------------------------|---------------------------------------------|
| $\text{C}^*=\text{O}$                               | 174.8-174.0                                 | $\text{C}^*\text{O}_2\text{CH}_2$                   | 125.9-175.1                                 |
| $\text{C}^*\text{N}$                                | 121.6-120.6                                 | $\text{C}^*\text{N}$                                | 121.6-120.3                                 |
| $\text{OC}^*\text{H}_2$                             | 67.8-67.0                                   | $\text{OC}^*\text{H}_2\text{CHOCH}_2$               | 67.2-66.7                                   |
| $\text{S}-\text{C}^*\text{H}_2\text{OH}$            | 62.8-62.6                                   | $\text{S}-\text{CH}_2\text{C}^*\text{H}_2\text{OH}$ | 62.9-62.6                                   |
| $\text{OC}^*\text{H}_2\text{CH}_2\text{OH}$         | 60.6-60.4                                   | $\text{C}^*\text{HOCH}_2$                           | 50.0-49.8                                   |
| $\text{CH}_2\text{C}^*\text{HCOO}$                  | 42.7-42.3                                   | $\text{CH}_2\text{CH}_3\text{C}^*\text{COO}$        | 46.4-46.1                                   |
| $\text{C}^*\text{H}_2\text{CHCOO}$                  | 36.1-35.8                                   | $\text{CHOC}^*\text{H}_2$                           | 45.2-49.8                                   |
| $\text{C}^*\text{H}_2\text{CHCN}$                   | 34.7-34.0                                   | $\text{C}^*\text{H}_2\text{CH}_3\text{C}$           | 36.2-35.9                                   |
| $\text{CH}_2\text{C}^*\text{HCN}$                   | 29.7-28.1                                   | $\text{C}^*\text{H}_2\text{CHCN}$                   | 34.8-34.1                                   |
| $\text{S}-\text{C}^*\text{H}_2\text{CH}_2\text{OH}$ | 15.5-15.3                                   | $\text{CH}_2\text{C}^*\text{HCN}$                   | 29.8-28.1                                   |
|                                                     |                                             | $\text{CH}_2\text{C}^*\text{H}_3\text{CCOO}$        | 21.0-20.8                                   |
|                                                     |                                             | $\text{S}-\text{C}^*\text{H}_2\text{CH}_2\text{OH}$ | 15.6-15.3                                   |

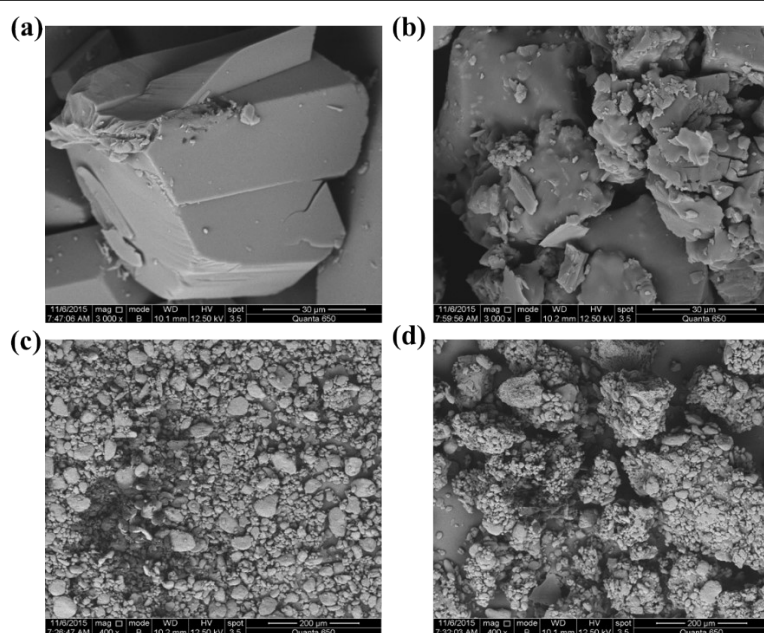

Figure S1. the morphologies of HMX (a) before and (b) after coating by NPBA-2. The morphologies of RDX (c) before and (d) after coating by NPBA-2.

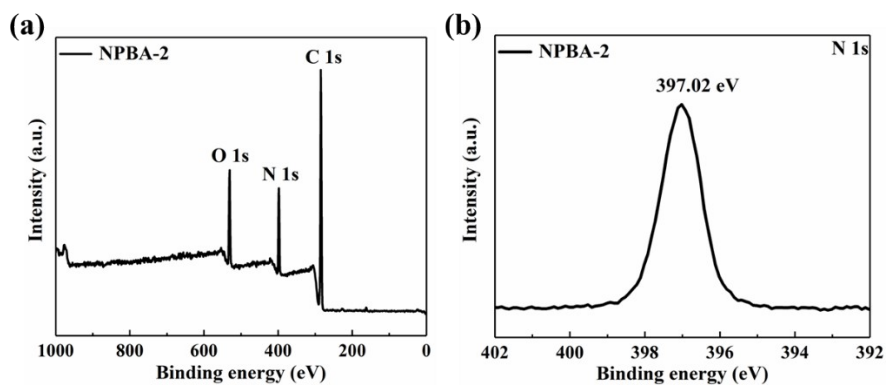

Figure S2. (a) The XPS spectrum of pure NPBA-2. (b) The N 1s XPS spectrum of pure NPBA-2.
